# Supplementary material
Source: PubMed Central journal article supplement (PMC9185627)
Supplement: ajcr0012-2012-f8.pdf [file ajcr0012-2012-f8.pdf]

## hsa\_circ\_0001741 promotes cancer stemness in ESCC

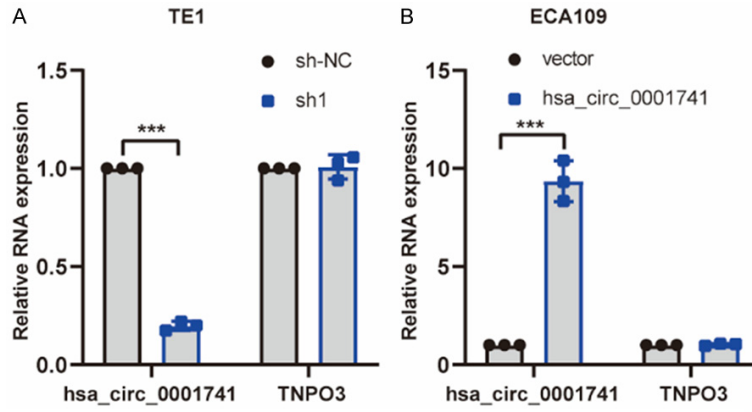

**Figure S1.** hsa\_circ\_0001741 expression levels in cell lines. hsa\_circ\_0001741 expression was stable knockdown in TE1 cell line (A) and overexpressed in ECA109 cell line (B). \*\*\*P < 0.001.
